# Supplementary material
Source: Springer Nature journal article supplement (https://www.springermedizin.de/resource/supplementary/12950_2011_214_MOESM8_ESM.pdf/9558212)

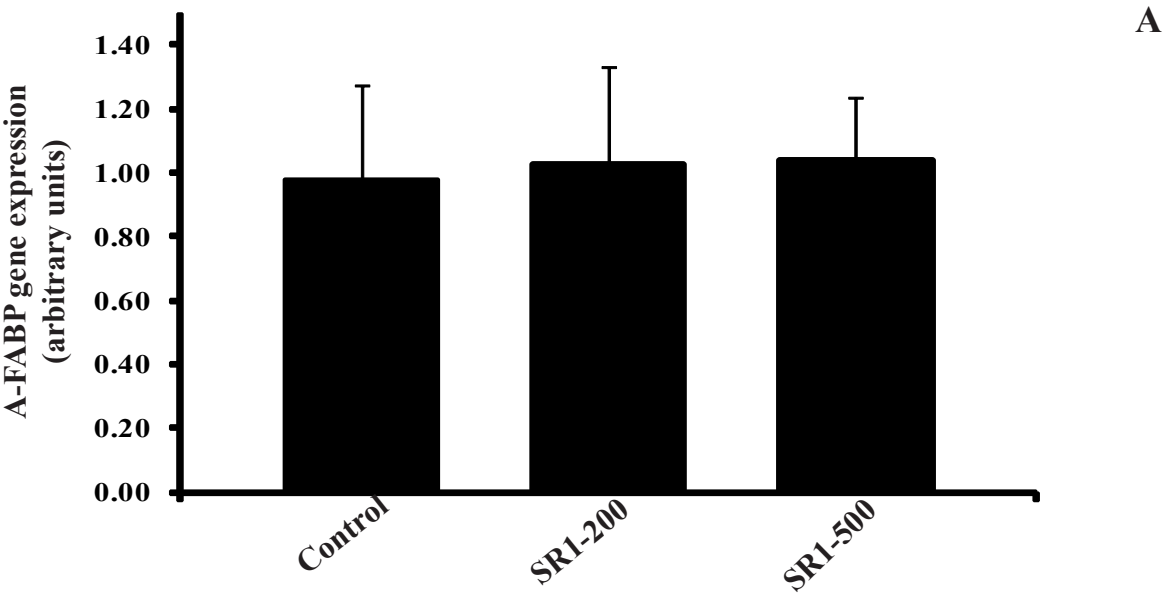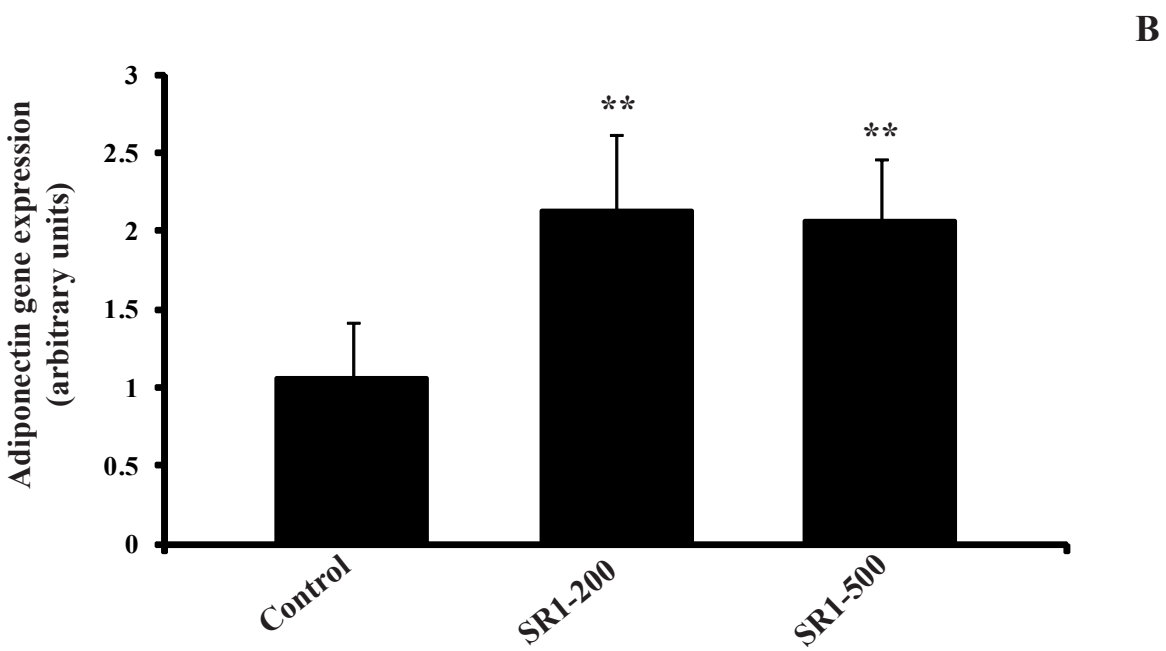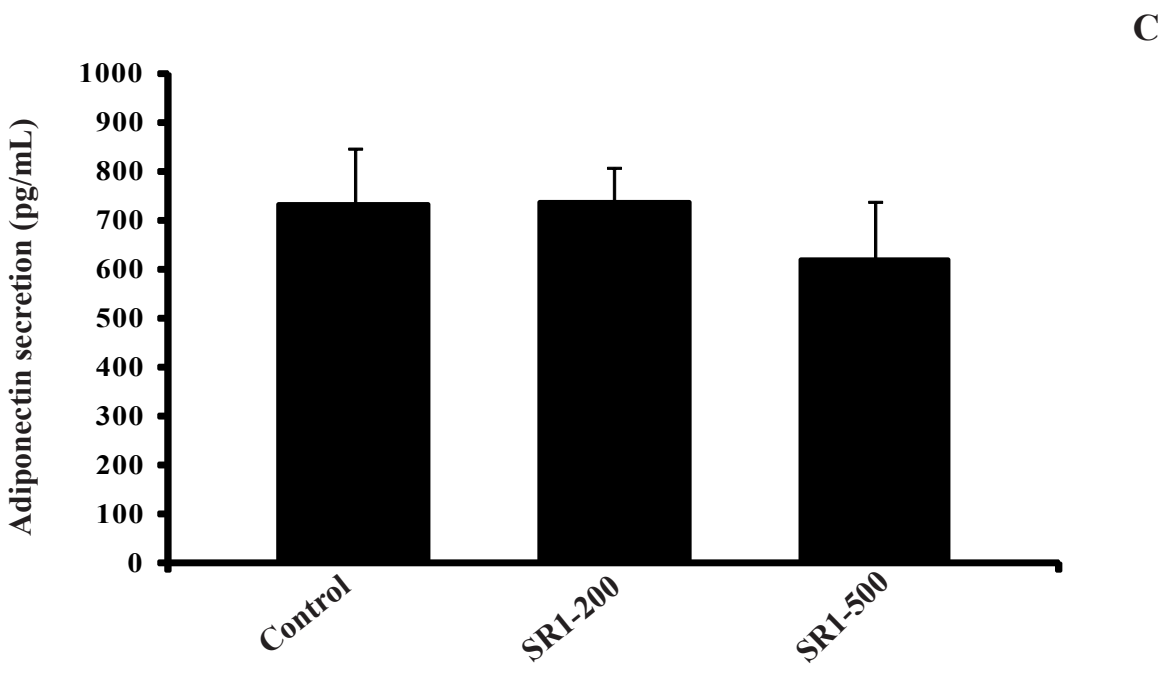

Supplement: MOESM8 [file 9558212]
